# Supplementary material for: Two Decades after Mandibuloacral Dysplasia Discovery: Additional Cases and Comprehensive View of Disease Characteristics
Source: MDPI journal article supplement (doi:10.3390/genes12101508), 2021-09-26
Supplement: s1 [file s1]

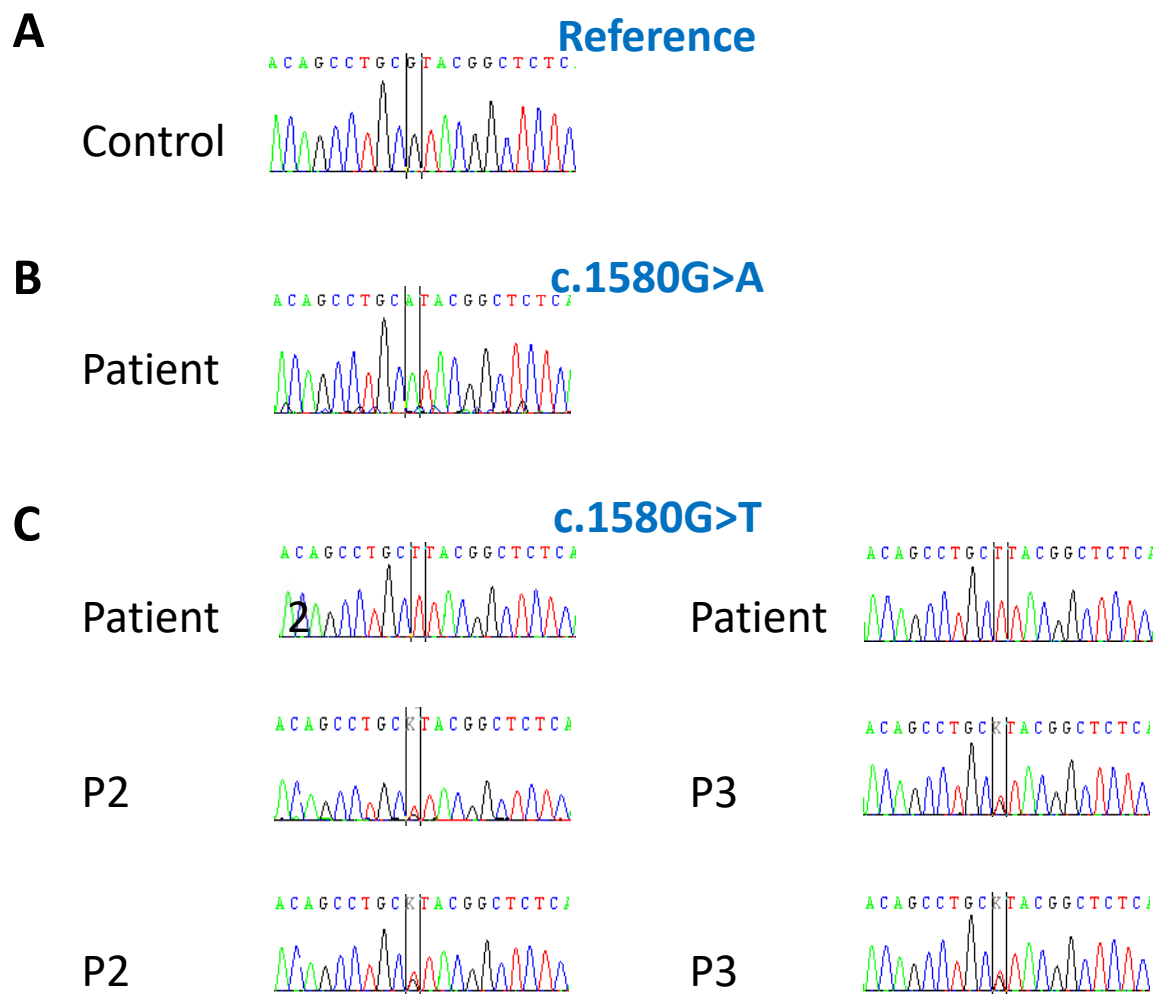

**Figure S1.** The Sanger sequencing electropherograms of exon 9 of LMNA, which revealed a homozygous c.1580 G>A mutation in P1 and a homozygous c.1580G>T mutation in P2 and P3.
